# Supplementary material for: An advanced electrocatalyst for efficient synthesis of ammonia based on chemically coupled NiS@MoS2 heterostructured nanospheres
Source: Royal Society of Chemistry journal article supplement (doi:10.1039/d1se00338k), 2021-01-01
Supplement: d1se00338k1.pdf [file d1se00338k1.pdf]

## Supporting information

### **Advanced electrocatalyst for efficient synthesis of ammonia based on chemically coupled NiS@MoS<sub>2</sub> heterostructured nanospheres**

Shoushuang Huang <sup>a</sup>, Chunyan Gao <sup>a</sup>, Peijun Xin <sup>a</sup>, Haitao Wang <sup>a</sup>, Xiao Liu <sup>a</sup>, Ye Wu <sup>a</sup>, Qingquan He <sup>a</sup>, Yong Jiang <sup>a</sup>, Zhangjun Hu <sup>\*, a, b</sup>, Zhiwen Chen <sup>\*, a</sup>

<sup>a</sup> School of Environmental and Chemical Engineering, Shanghai University, Shanghai, 200444, China

<sup>b</sup> Division of Molecular Surface Physics & Nanoscience, Department of Physics, Chemistry and Biology, Linköping University, Linköping 58183, Sweden

Corresponding Author:

E-mail:

zwchen@shu.edu.cn

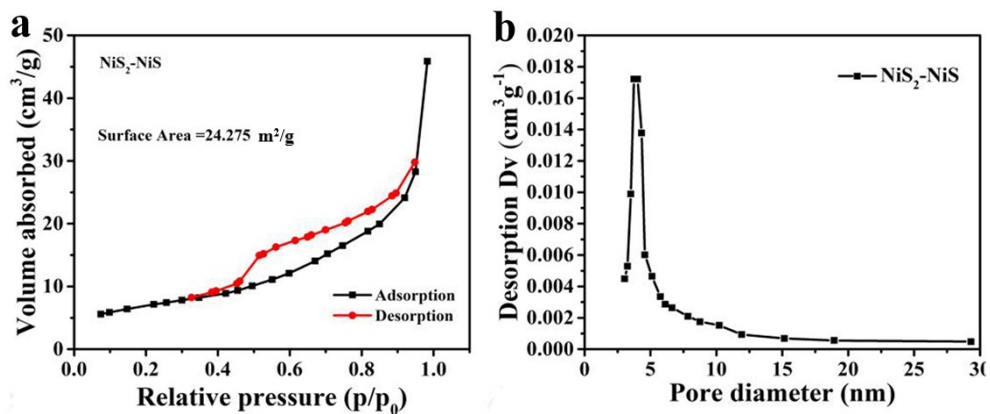

Fig. S1. (a) Nitrogen adsorption/desorption isotherms. (b) Pore diameter distribution curve of NiS<sub>2</sub>-NiS nanospheres.

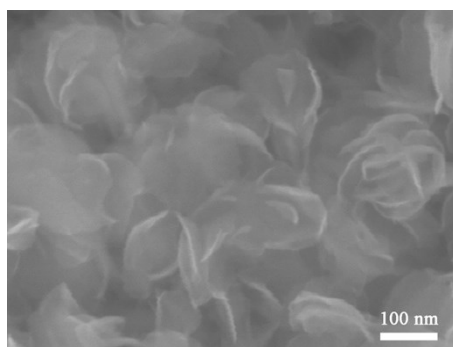

Fig. S2. SEM image of the as-synthesized pure MoS<sub>2</sub> product.

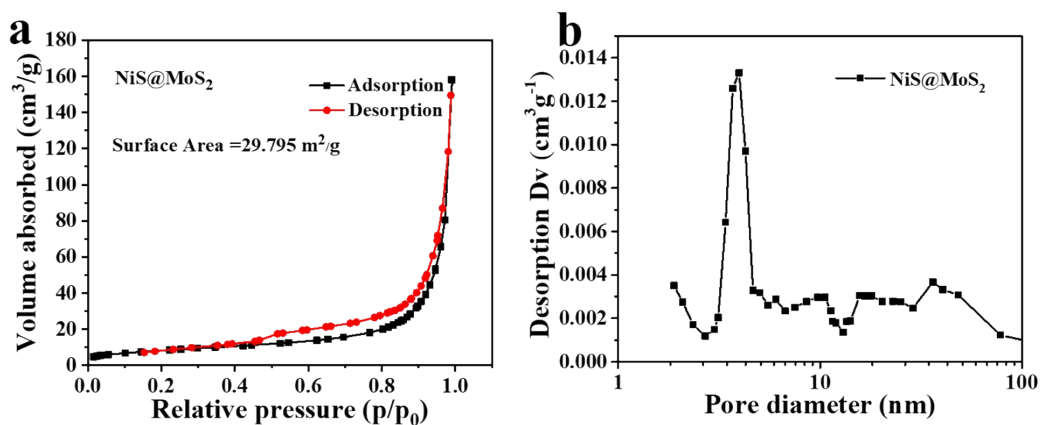

Fig. S3. (a) Nitrogen adsorption/desorption isotherms. (b) Pore diameter distribution curve of NiS@MoS<sub>2</sub> nanocomposites.

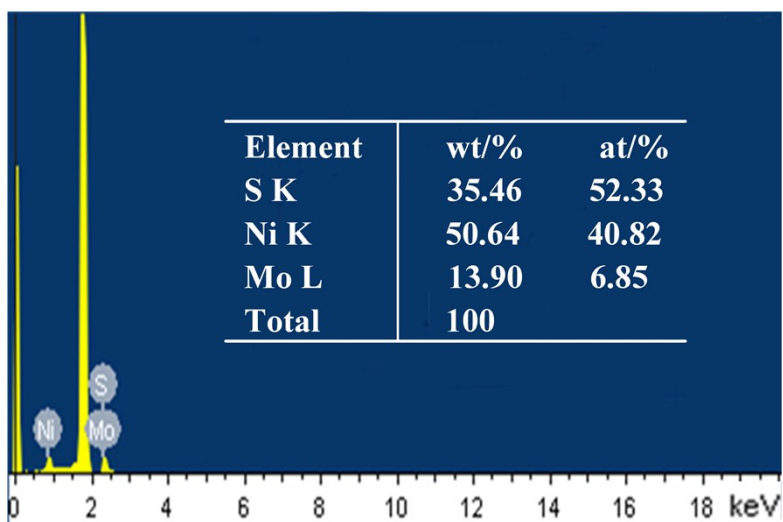

Fig. S4. The energy-dispersive X-ray spectroscopy (EDX) of the as-synthesized NiS@MoS<sub>2</sub> heterostructures.

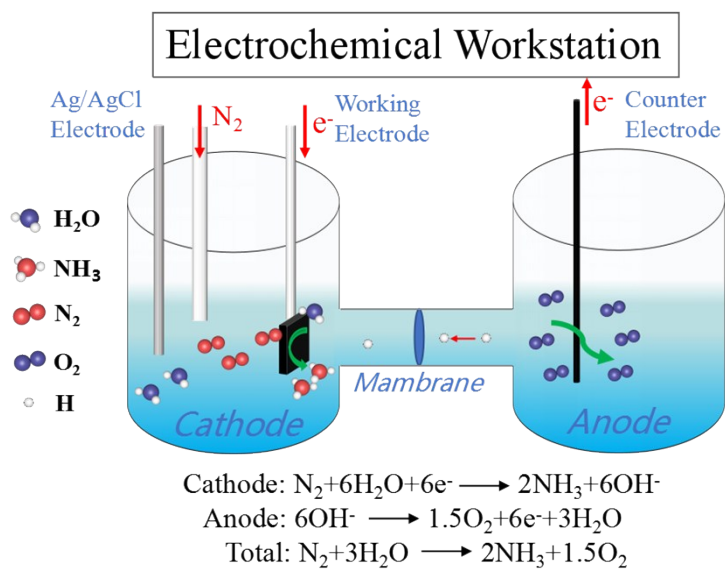

Fig. S5. Schematic illustration of the NRR process.

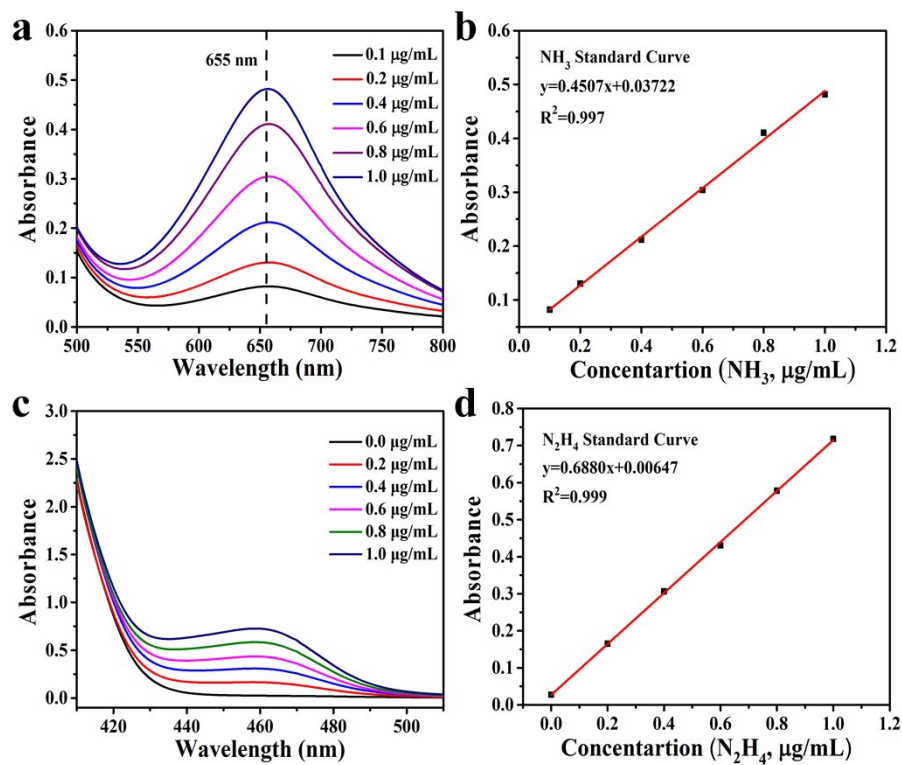

Fig. S6. (a) Absorbance spectra of indophenol blue in  $\text{NH}_4^+$  solutions at various concentrations. (b) Linear correlation of the absorbance intensity to  $\text{NH}_4^+$  concentration. (c) UV-vis curves of  $\text{N}_2\text{H}_4 \cdot \text{H}_2\text{O}$  after incubated for 10 min at room temperature. (d) Calibration curve used for calculation of  $\text{N}_2\text{H}_4$  concentration.

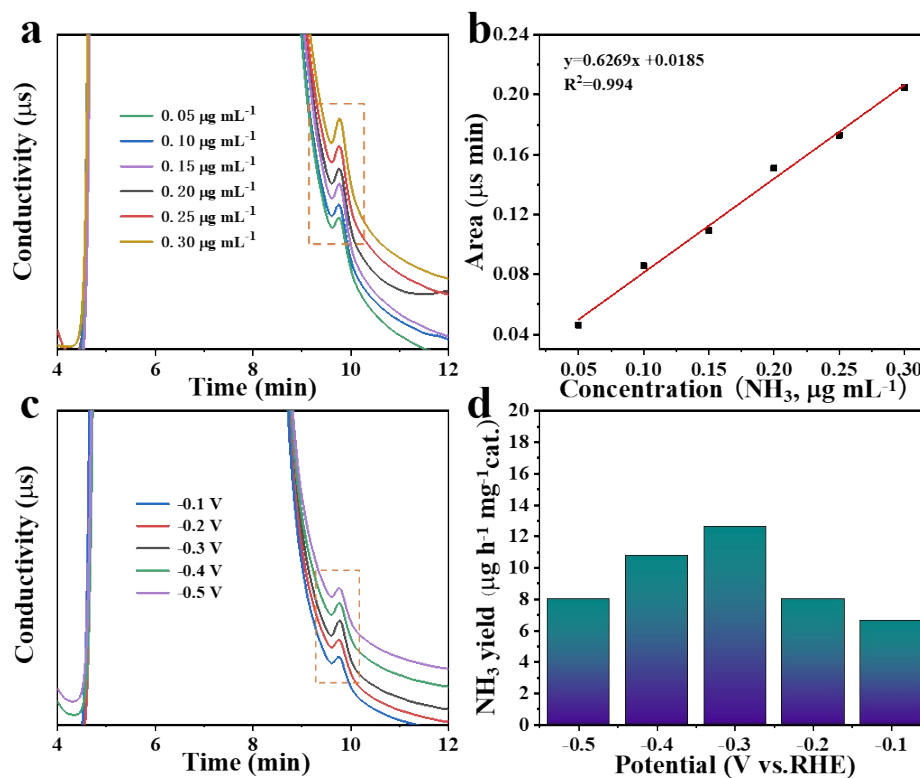

Fig. S7. (a) Ion chromatogram of  $\text{NH}_4\text{Cl}$  with different concentrations in 0.1 M  $\text{Na}_2\text{SO}_4$  and (b) corresponding standard curve. (c) Ion chromatogram for the electrolytes at a series of potentials after electrolysis for 2 h. (d)  $\text{NH}_3$  yield of  $\text{NiS@MoS}_2$  at corresponding potentials.

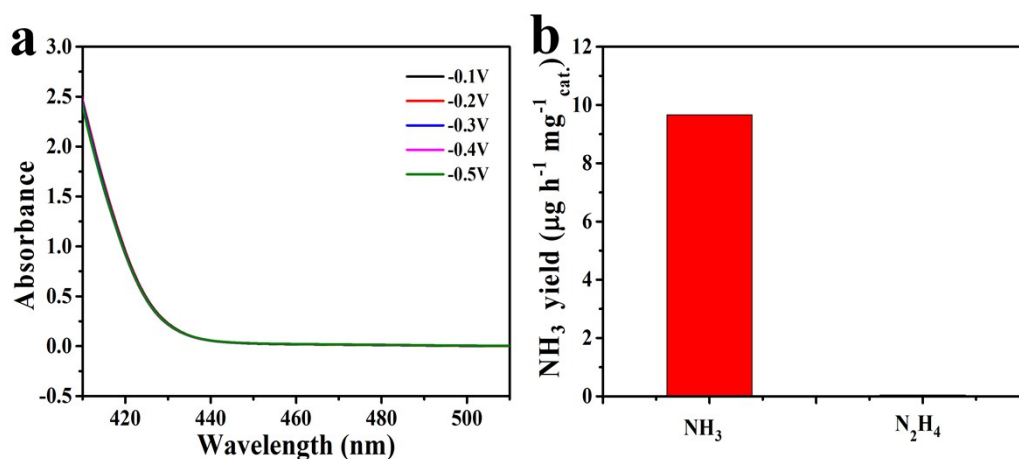

Fig. S8. (a) UV-vis absorption spectra of the electrolytes stained by the Watt and Chrisp method after potentiostatic tests. (b) The yield rate for ammonia and hydrazine generated during electrochemical NRR at  $-0.3$  V vs. RHE.

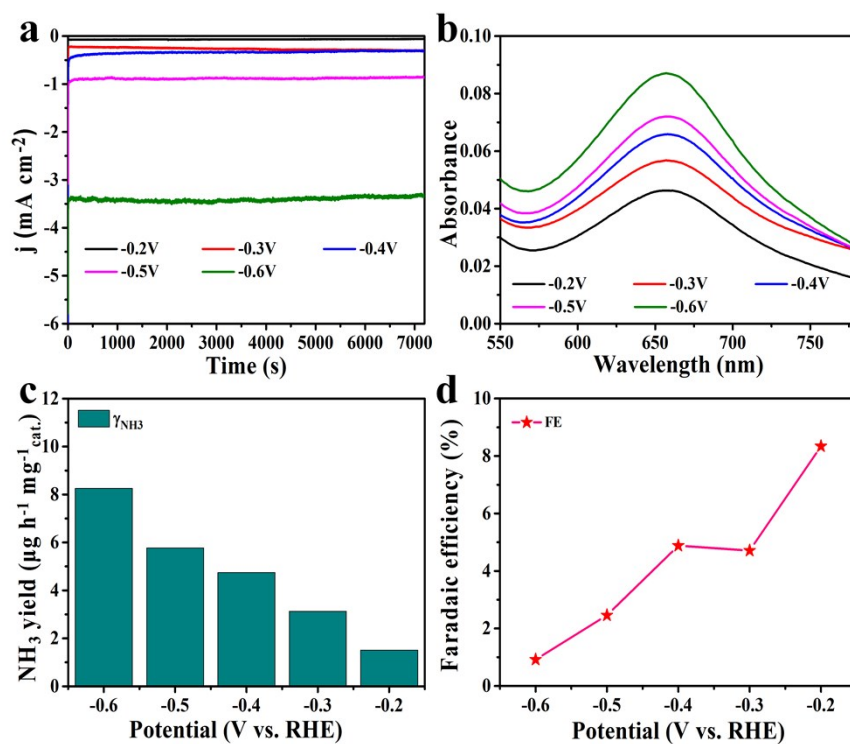

Fig. S9. NRR electrocatalysis of MoS<sub>2</sub>. (a) CA tests for 2 h with MoS<sub>2</sub> electrode at various potentials from -0.6 to -0.2 V vs. RHE. (b) Corresponding UV-vis spectra of electrolytes colored with indophenol indicator. (c) Ammonia yield rates at various potentials. (d) Faradaic efficiencies at various potentials.

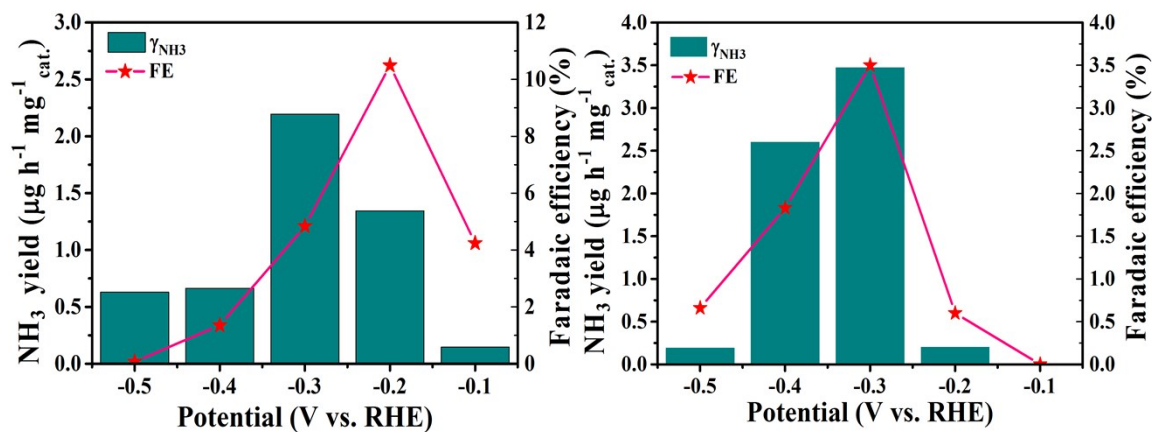

Fig. S10. NH<sub>3</sub> yields and Faradaic efficiencies for γ-NiOOH/NiS<sub>x</sub> (a) and NiS<sub>2</sub>-NiS (b) at a series of potentials for 2 h.

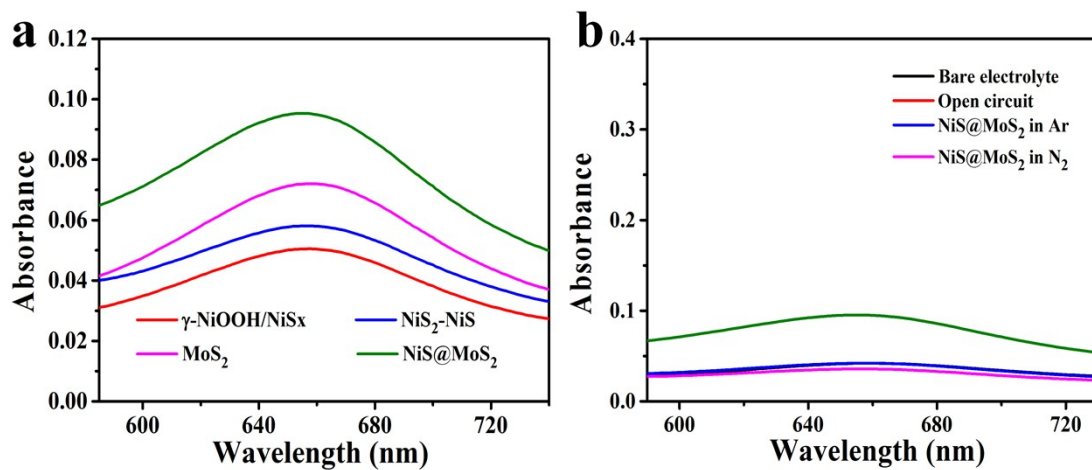

Fig. S11. (a) Comparison of catalytic performances of various electrocatalysts at -0.3 V vs. RHE. (b) UV-vis absorption spectra of the electrolytes stained with an indophenol indicator after potentiostatic tests under different conditions.

Table S1. Comparison of the electrocatalytic N<sub>2</sub> reduction performance for NiS@MoS<sub>2</sub> with other aqueous-based NRR electrocatalysts under ambient conditions.

| <b>Catalyst</b>                          | <b>Electrolyte</b>                    | <b>NH<sub>3</sub> yield</b>                               | <b>FE (%)</b> | <b>Ref.</b>      |
|------------------------------------------|---------------------------------------|-----------------------------------------------------------|---------------|------------------|
| NiS@MoS <sub>2</sub>                     | 0.1 M Na <sub>2</sub> SO <sub>4</sub> | 9.66 μg h <sup>-1</sup> ·mg <sup>-1</sup> <sub>cat</sub>  | 14.8          | <b>This work</b> |
| Pd/C                                     | 0.1 M PBS                             | 4.5 μg h <sup>-1</sup> ·mg <sup>-1</sup> <sub>cat</sub>   | 8.2           | [1]              |
| γ-Fe <sub>2</sub> O <sub>3</sub>         | 0.1 M KOH                             | 0.212 μg h <sup>-1</sup> ·mg <sup>-1</sup> <sub>cat</sub> | 1.9           | [2]              |
| Pd <sub>0.2</sub> Cu <sub>0.8</sub> /rGO | 0.1 M KOH                             | 2.8 μg h <sup>-1</sup> ·mg <sup>-1</sup> <sub>cat</sub>   | 4.5           | [3]              |
| α-Au/CeO <sub>x</sub> -RGO               | 0.1 M HCl                             | 8.31 μg h <sup>-1</sup> ·mg <sup>-1</sup> <sub>cat</sub>  | 10.1          | [4]              |
| Au nanorods                              | 0.1 M KOH                             | 6.042 μg h <sup>-1</sup> ·mg <sup>-1</sup> <sub>cat</sub> | 4             | [5]              |
| Fe <sub>2</sub> O <sub>3</sub> -CNT      | KHCO <sub>3</sub>                     | 0.22 μg h <sup>-1</sup> cm <sup>-2</sup>                  | 0.15          | [6]              |
| Pd-Co/CuO                                | 0.1 M KOH                             | 10.04 μg h <sup>-1</sup> ·mg <sup>-1</sup> <sub>cat</sub> | 2.16          | [7]              |
| Fe/Fe <sub>3</sub> O <sub>4</sub>        | 0.1 M PBS                             | 0.19 μg h <sup>-1</sup> cm <sup>-2</sup>                  | 8.19          | [8]              |
| Mo nanofilm                              | 0.01 M H <sub>2</sub> SO <sub>4</sub> | 1.89 μg h <sup>-1</sup> cm <sup>-2</sup>                  | 0.72          | [9]              |
| PEBCD/C                                  | 0.5 M Li <sub>2</sub> SO <sub>4</sub> | 1.58 μg h <sup>-1</sup> cm <sup>-2</sup>                  | 2.85          | [10]             |



## References

- [1] J. Wang, L. Yu, L. Hu, G. Chen, H.L. Xin, X.F. Feng, *Nat. Commun.* 9 (2018).
- [2] J. Kong, A. Lim, C. Yoon, J.H. Jang, H.C. Ham, J. Han, S. Nam, D. Kim, Y.-E. Sung, J. Choi, H.S. Park, *ACS Sustainable Chem. Eng.*, 5 (2017) 10986-10995.
- [3] M.-M. Shi, D. Bao, S.-J. Li, B.-R. Wulan, J.-M. Yan, Q. Jiang, *Adv. Energy Mater.* 8 (2018).
- [4] S.-J. Li, D. Bao, M.-M. Shi, B.-R. Wulan, J.-M. Yan, Q. Jiang, *Adv. Mater.* 29 (2017).
- [5] D. Bao, Q. Zhang, F.-L. Meng, H.-X. Zhong, M.-M. Shi, Y. Zhang, J.-M. Yan, Q. Jiang, X.-B. Zhang, *Adv. Mater.* 29 (2017).
- [6] S. Chen, S. Perathoner, C. Ampelli, C. Mebrahtu, D. Su, G. Centi, *Angew. Chem., Int. Ed.* 56 (2017) 2699-2703.
- [7] W. Fu, Y. Cao, Q. Feng, W.R. Smith, P. Dong, M. Ye, J. Shen, *Nanoscale* 11 (2019) 1379-1385.
- [8] L. Hu, A. Khaniya, J. Wang, G. Chen, W.E. Kaden, X. Feng, *ACS Catal.* 8 (2018) 9312-9319.
- [9] D. Yang, T. Chen, Z. Wang, *J. Mater. Chem. A* 5 (2017) 18967-18971.
- [10] G.-F. Chen, X.R. Cao, S.Q. Wu, X.Y. Zeng, L.-X. Ding, M. Zhu, H.H. Wang, *J. Am. Chem. Soc.* 139 (2017) 9771-9774.
